# Supplementary material for: Validation and Invalidation of Chemical Probes for the Human N-myristoyltransferases
Source: PubMed Central journal article supplement (PMC6593224; doi:10.1016/j.chembiol.2019.03.006), 2019-06-20
Supplement: mmc1.pdf [file mmc1.pdf]

**Cell Chemical Biology, Volume 26**

**Supplemental Information**

**Validation and Invalidation of Chemical Probes  
for the Human *N*-myristoyltransferases**

**Wouter W. Kallemeijn, Gregor A. Lueg, Monica Faronato, Kate Hadavizadeh, Andrea Goya Grocin, Ok-Ryul Song, Michael Howell, Dinis P. Calado, and Edward W. Tate**

# Validation and invalidation of chemical probes for the human *N*-myristoyltransferases.

## Supplementary Information

Wouter W. Kallemeijn<sup>1,+</sup>, Gregor A. Lueg<sup>1,2,+</sup>, Monica Faronato<sup>1,2</sup>, Kate Hadavizadeh<sup>1</sup>, Andrea Goya Grocin<sup>1</sup>, Ok-Ryul Song<sup>2</sup>, Michael Howell<sup>2</sup>, Dinis P. Calado<sup>2,3</sup>, Edward W. Tate<sup>1,2\*</sup>.

<sup>1</sup>Department of Chemistry, Imperial College London, Molecular Research Science Hub, 80 Wood Lane, London W12 0BZ, United Kingdom.

<sup>2</sup>The Francis Crick Institute, 1 Midland Road, London NW1 1AT, United Kingdom.

<sup>3</sup>Peter Gorer Department of Immunobiology, School of Immunology & Microbial Sciences, King's College London, London SE1 9RT, United Kingdom.

<sup>+</sup>Authors contributed equally to this work.

<sup>\*</sup>Lead contact: correspondence to [e.tate@imperial.ac.uk](mailto:e.tate@imperial.ac.uk)

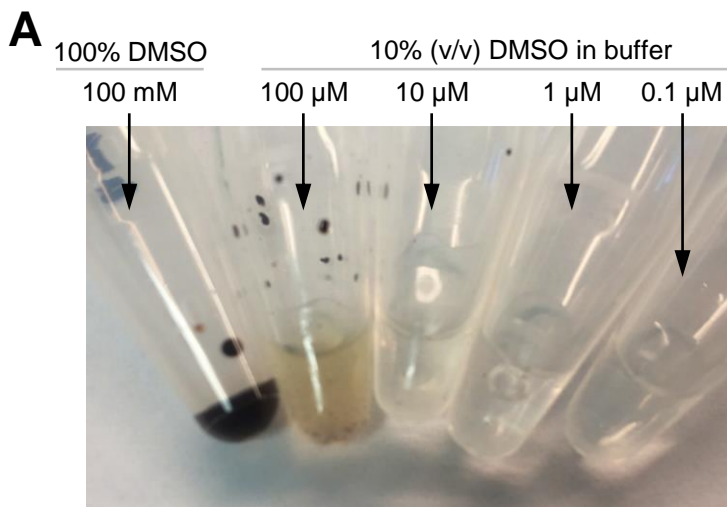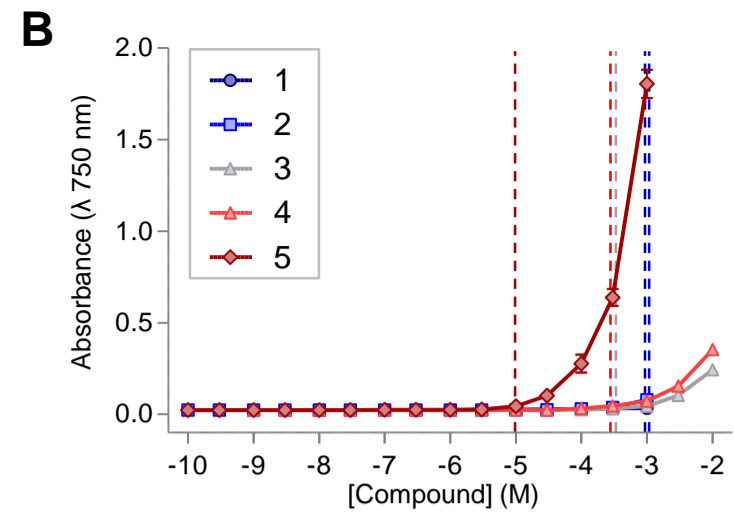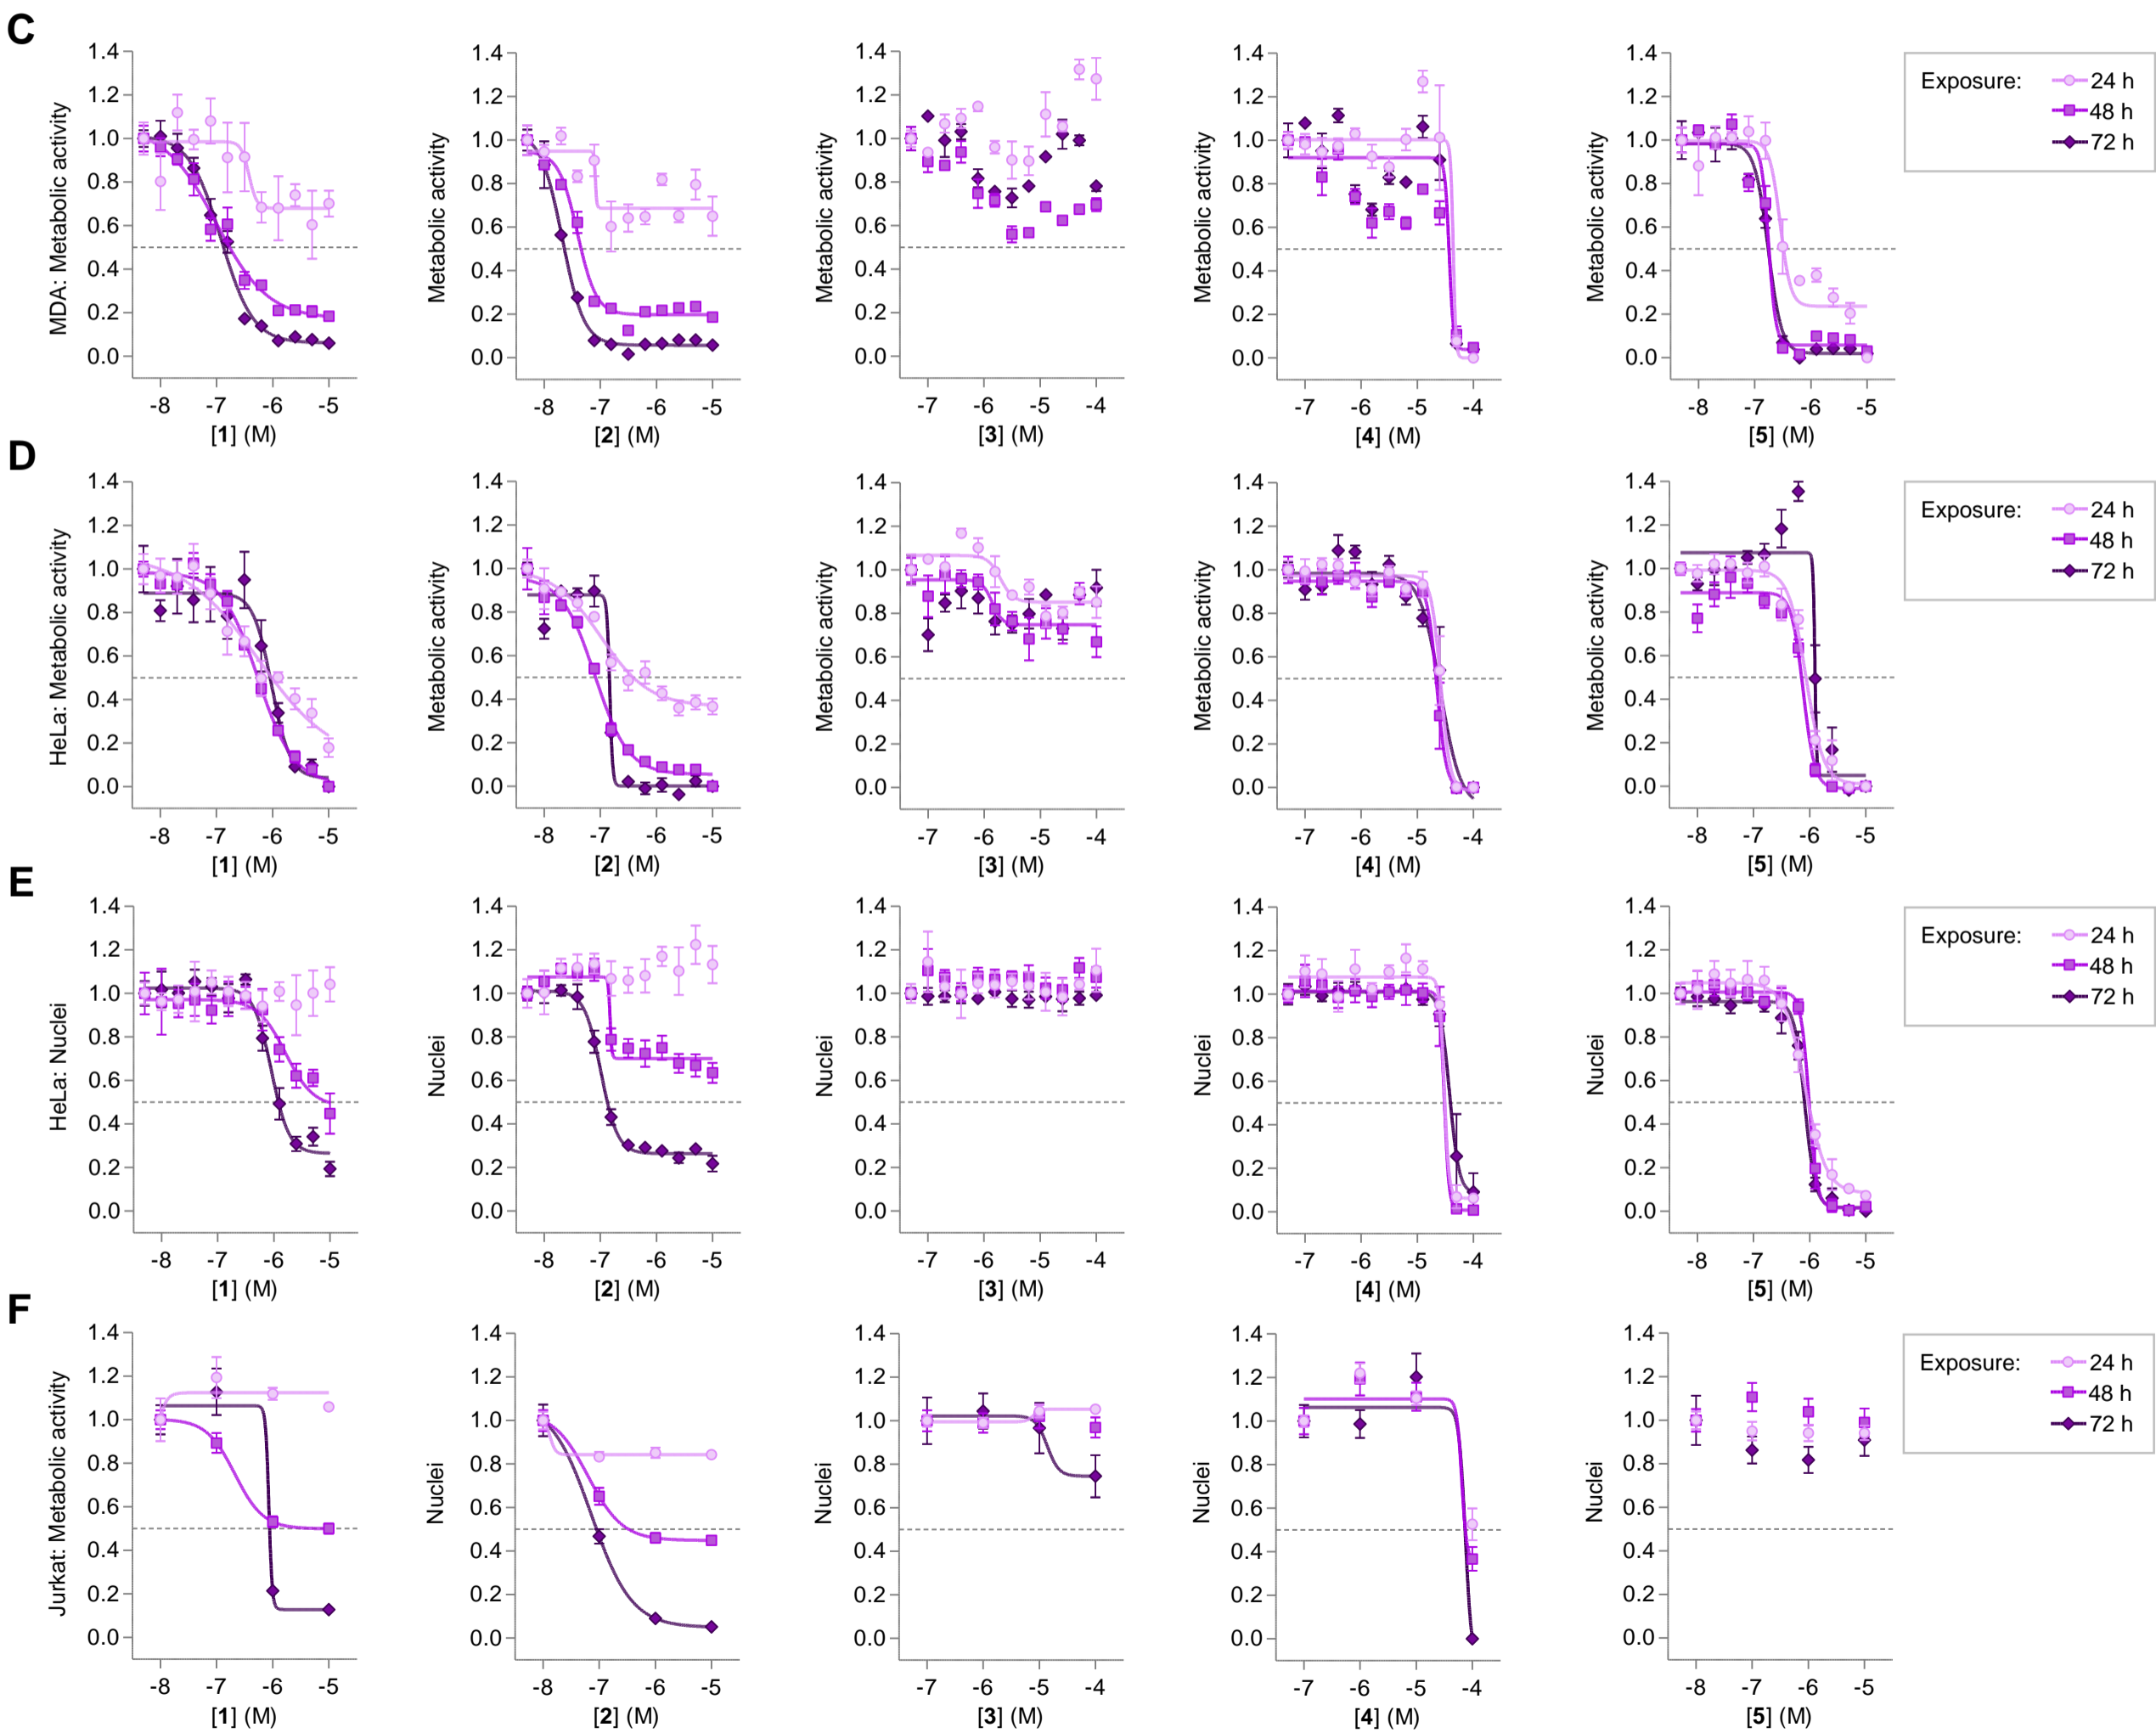

## Supplemental Figure 1. Effect of compounds 1-5 on recombinant protein and living cells.

Related to Figure 1.

- (A) Image showing precipitation of **5** at various concentrations, within 5 min after dilution.
- (B) Precipitation prevalence of compounds **1-5** in rNMT1 buffer, containing 0.1% (v/v) DMSO.  
Absorbance at 750 nm was determined after 15 min at room temperature. Arrows indicate prevalence of precipitates.
- (C) Metabolic activity of MDA-MB-231 cells exposed to a range of **1-5** concentrations for 24, 48 and 72 h. Mean of quadruplicate measurements,  $\pm$  SEM.
- (D) Metabolic activity of HeLa cells exposed to a range of **1-5** concentrations for 24, 48 and 72 h.  
Mean of quadruplicate measurements,  $\pm$  SEM.
- (E) Nuclei counts of HeLa cells after exposure to **1-5** for 24, 48 and 72 h. Mean of quadruplicate measurements,  $\pm$  SEM.
- (F) Metabolic activity of Jurkat cells exposed to a range of **1-5** concentrations for 24, 48 and 72 h.  
Mean of quadruplicate measurements,  $\pm$  SEM.

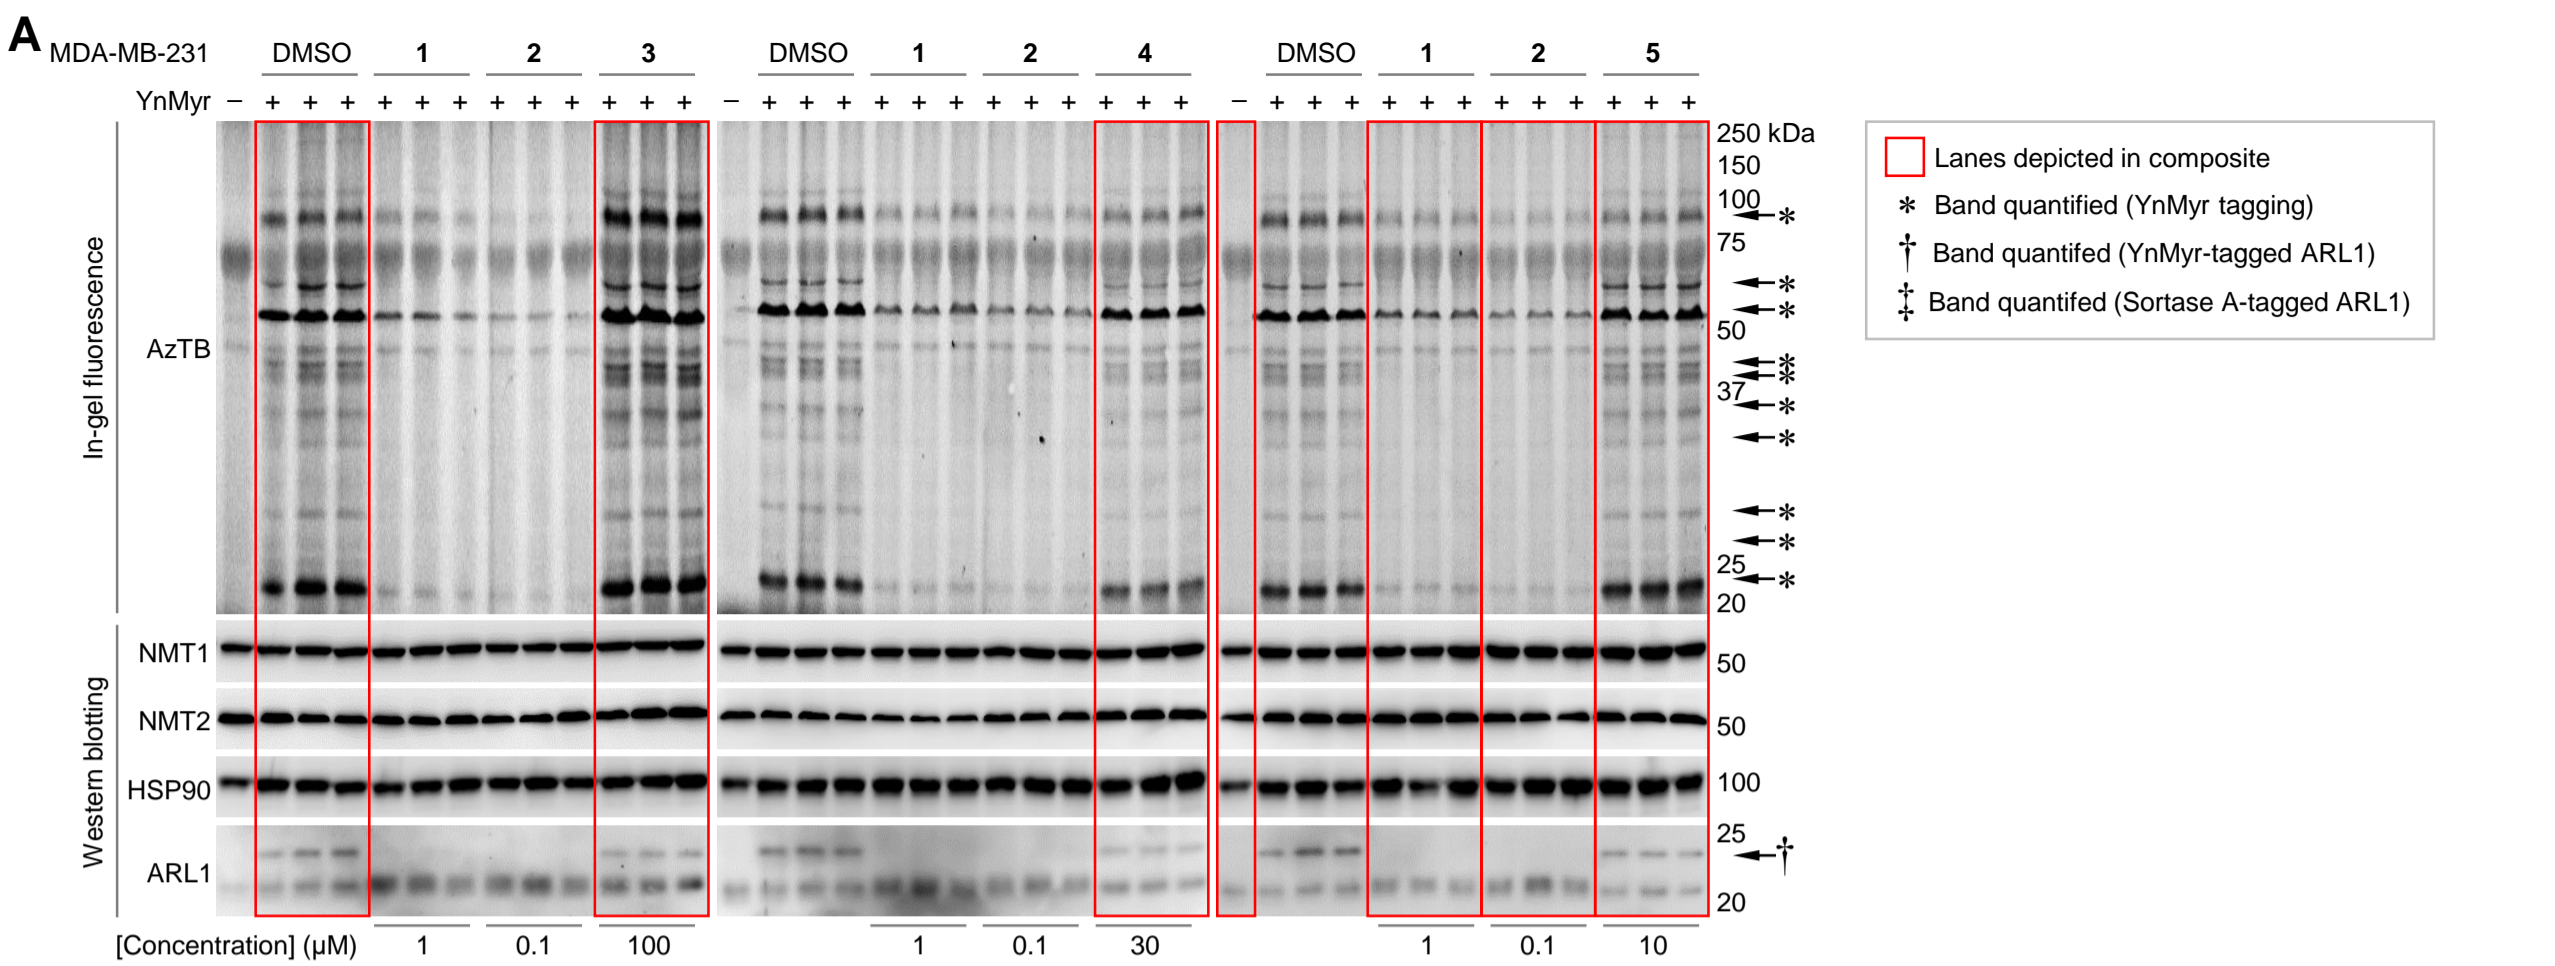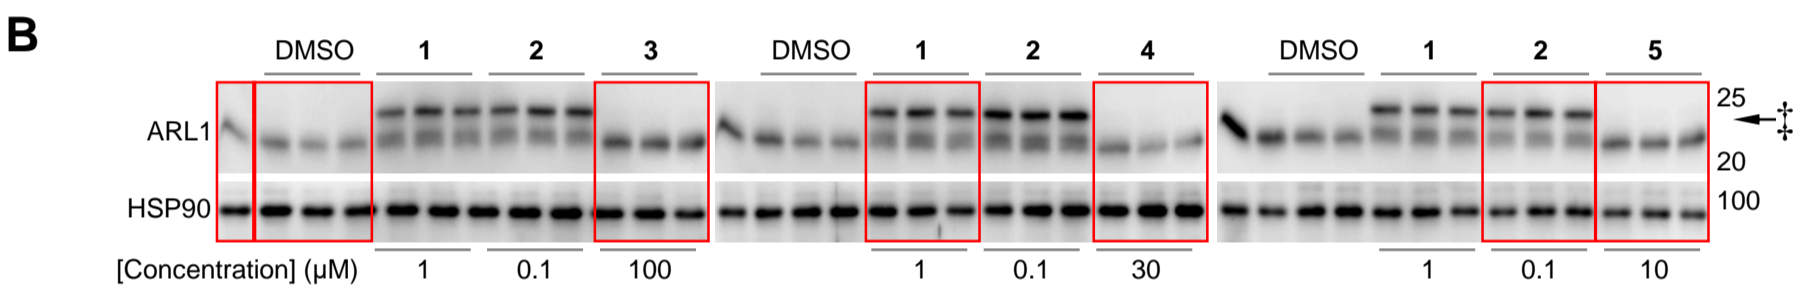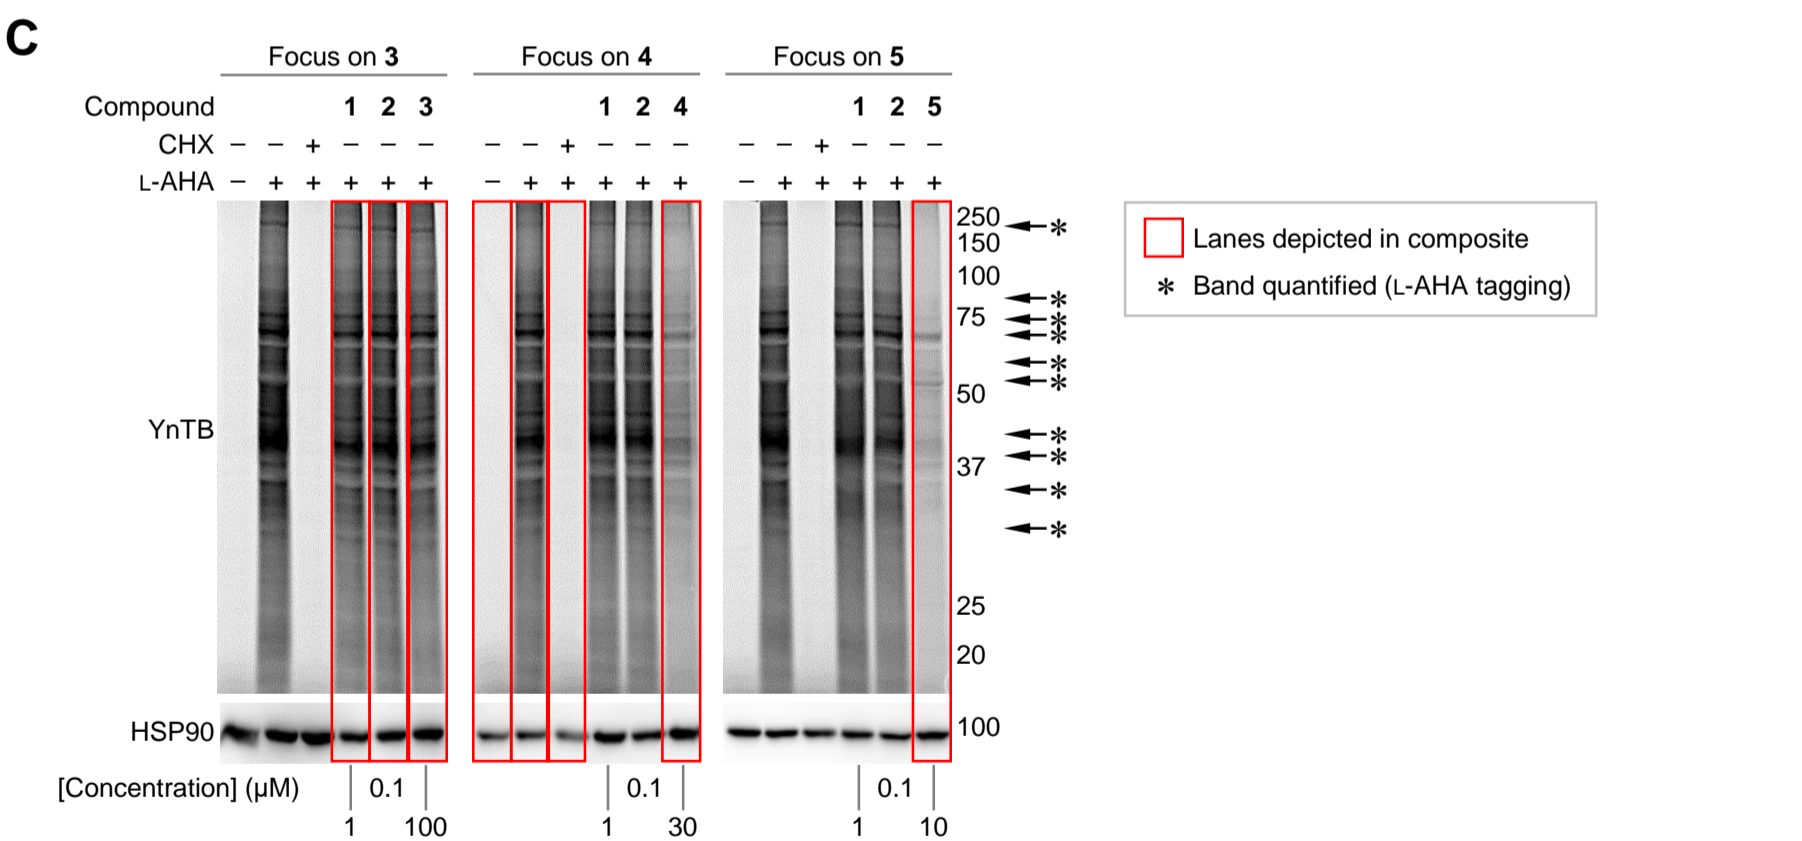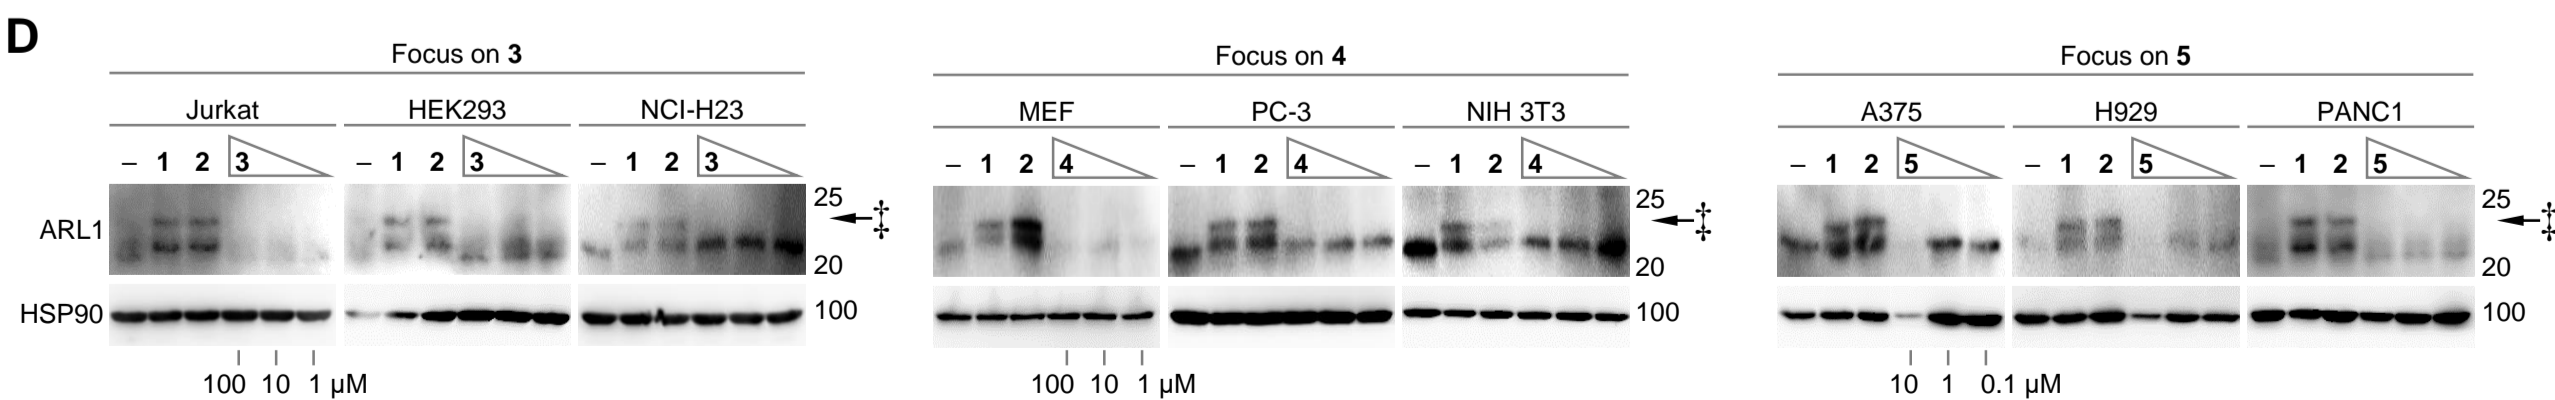

## Supplemental Figure 2. Effect of compounds 1-5 on MDA-MB-231 cells.

Related to Figures 2 and 4.

- (A) Effects on *N*-myristoylation revealed by YnMyr-tagging in MDA-MB-231 cells. Left to right: cells exposed to DMSO (–), **1**, **2**, and per gel compared to **3**, **4** and **5**, in triplicate. Top to bottom: in-gel visualisation of YnMyr-tagged proteins; Westernblot (WB) detection of NMT1, NMT2, loading control HSP90 and NMT-substrate ARL1. Higher MW form of ARL1 (†) indicates NMT activity. Red squares depict regions selected for Fig 2B.
- (B) Effects on *N*-myristoylation in MDA-MB-231 cells revealed by Sortase A-mediated peptide addition. Left to right: cells exposed to DMSO (–), **1**, **2**, and per gel compared to **3**, **4** and **5**, in triplicate. Top: WB detection of NMT-substrate ARL1. Higher MW form of ARL1 (‡) indicates NMT inhibition. Bottom: loading control HSP90. Red squares depict regions selected for Fig 2F.
- (C) Effects on *de novo* protein synthesis in MDA-MB-231 revealed by L-AHA incorporation. Left to right: cells exposed to DMSO (–), **1**, **2**, and per gel compared to **3**, **4** and **5**, in triplicate. Top: in-gel visualisation of L-AHA-tagged proteins. Below: loading control HSP90. Red squares depict regions selected for Fig 4B.
- (D) Effects on *N*-myristoylation in a panel of cell lines revealed by Sortase A-mediated peptide addition. Left to right: cells exposed to DMSO (–), **1**, **2**, and compared to different concentrations of **3** (100, 10 and 1  $\mu$ M), **4** (100, 10 and 1  $\mu$ M) and **5** (10, 1 and 0.1  $\mu$ M). Top: WB detection of NMT-substrate ARL1. Higher MW form of ARL1 (‡) indicates NMT inhibition. Bottom: loading control HSP90.





### Supplemental Figure 3. Effect of compounds 1-5 on HeLa cells.

Related to Figures 2 and 4.

- (A) Effects on *N*-myristoylation revealed by YnMyr-tagging in HeLa cells. Left to right: cells exposed to DMSO (–), **1**, **2**, and per gel compared to **3**, **4** and **5**, in triplicate. Top to bottom: in-gel visualisation of YnMyr-tagged proteins; Westernblot (WB) detection of NMT1, NMT2, loading control HSP90 and NMT-substrate ARL1. Higher MW form of ARL1 (†) indicates NMT activity.
- (B) Effects on *N*-myristoylation in HeLa cells revealed by Sortase A-mediated peptide addition. Left to right: cells exposed to DMSO (–), **1**, **2**, and per gel compared to **3**, **4** and **5**, in triplicate. Top: WB detection of NMT-substrate ARL1. Higher MW form of ARL1 (§) indicates NMT inhibition. Bottom: loading control HSP90.
- (C) Effects on *de novo* protein synthesis in HeLa revealed by L-AHA incorporation. Left to right: cells exposed to DMSO (–), **1**, **2**, and per gel compared to **3**, **4** and **5**, in triplicate. Top: in-gel visualisation of L-AHA-tagged proteins. Below: loading control HSP90.
- (D) Cell cycle distribution of HeLa after exposure to **1-5** for 18 h. Cells were analysed for G2/M, S and G1/0 through DNA content and proliferation by FACS. For the gating strategy and quantifications, see Fig S5C and S5D, respectively.
- (E) Effect on apoptosis. In HeLa cells of (D), active Caspase-3 protein staining detected by FACS. For the gating strategy and quantifications, see Fig S5C and S5D, respectively.
- (F) Brightfield micrographs depicting HeLa cells exposed to DMSO (top), **4** (middle) and **5** (bottom) for 18 h. Yellow square depicts the location of the detail area. Scale bar is 200 µm.



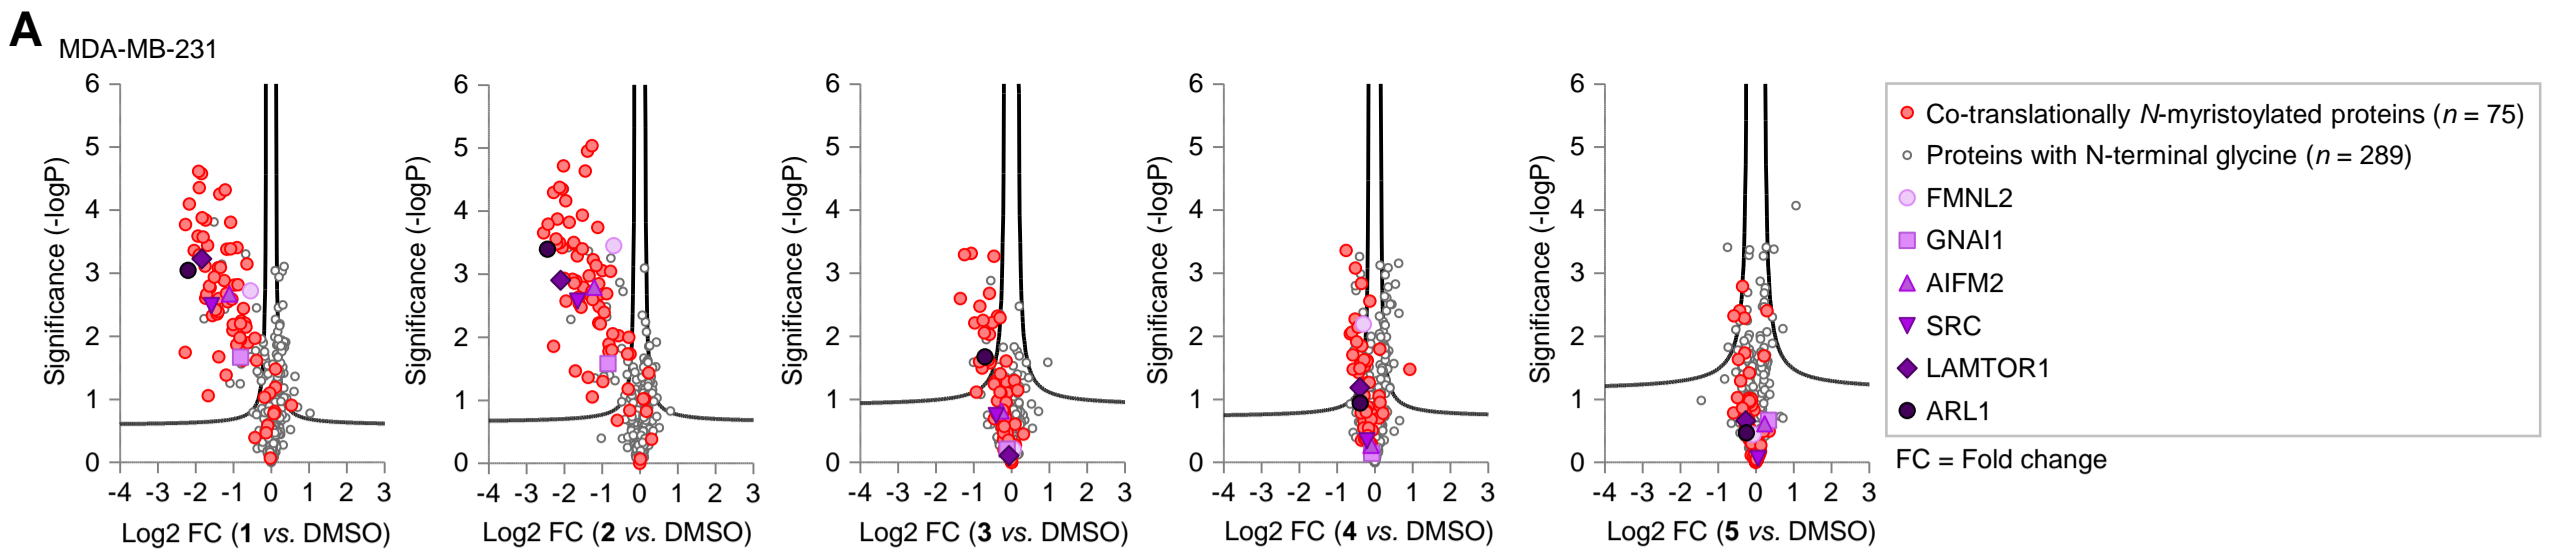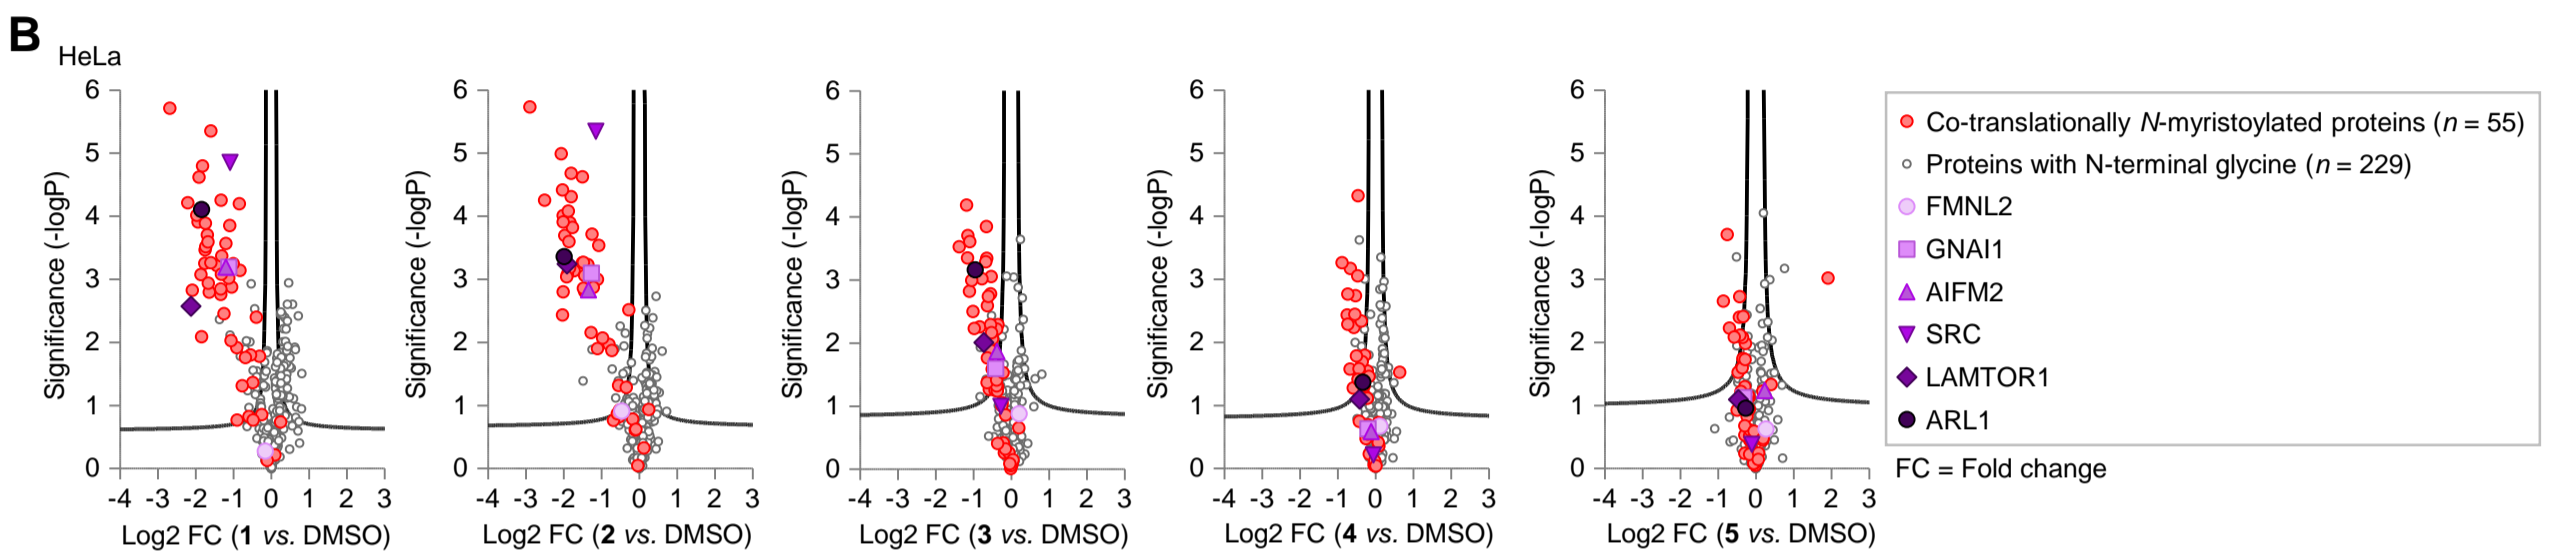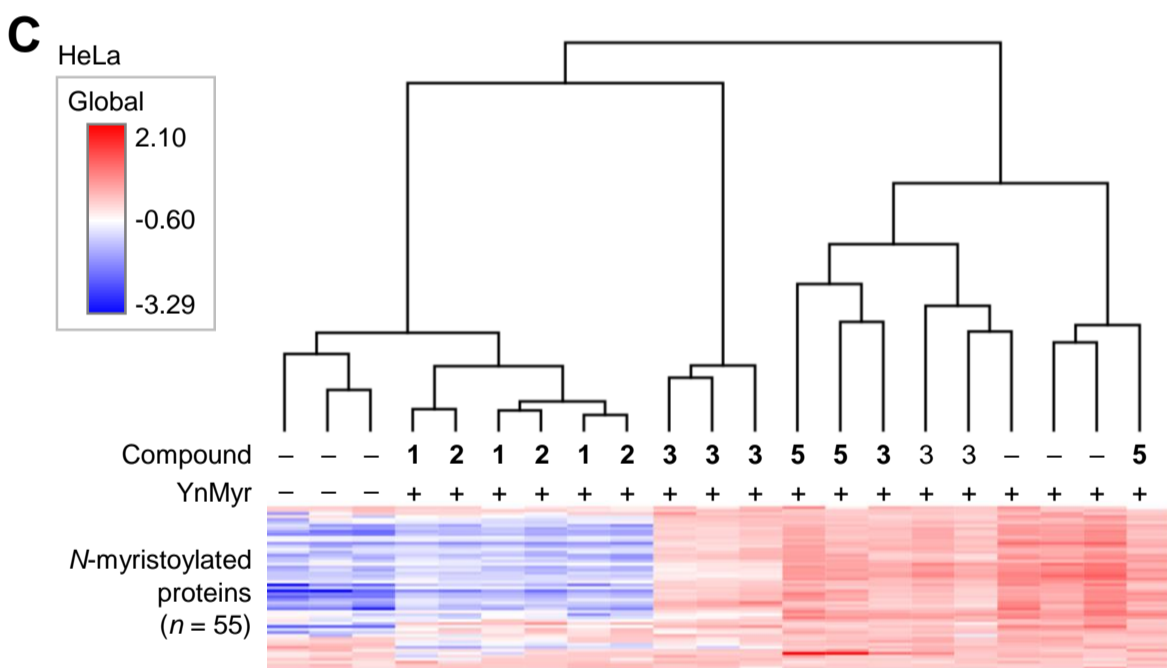

#### Supplemental Figure 4. Chemical proteomics on YnMyr-tagged proteins.

Related to Figure 3.

- (A) Volcano plots for MDA-MB-231 showing the Log<sub>2</sub> fold-change and significance of proteins identified after enrichment of YnMyr-tagged proteins and chemical proteomics. Depicted are co-translationally *N*-myristoylated proteins (red,  $n = 75$ ) and proteins with N-terminal glycines (grey,  $n = 289$ ). Left to right: Compound **1-5** versus DMSO. Responses of six known co-translationally *N*-myristoylated proteins are shown for each condition. A negative Log<sub>2</sub> fold-change indicates less protein identified in cells with compound compared to cells treated with DMSO only. Black lines depict the significance threshold FDR (0.01).
- (B) Volcano plots for HeLa, as above. Co-translationally *N*-myristoylated proteins (red,  $n = 55$ ) and proteins with N-terminal glycines (grey,  $n = 229$ ).
- (C) Hierarchical one-minus Pearson correlation clustering of the co-translationally *N*-myristoylated proteins quantified in HeLa ( $n = 55$ ).

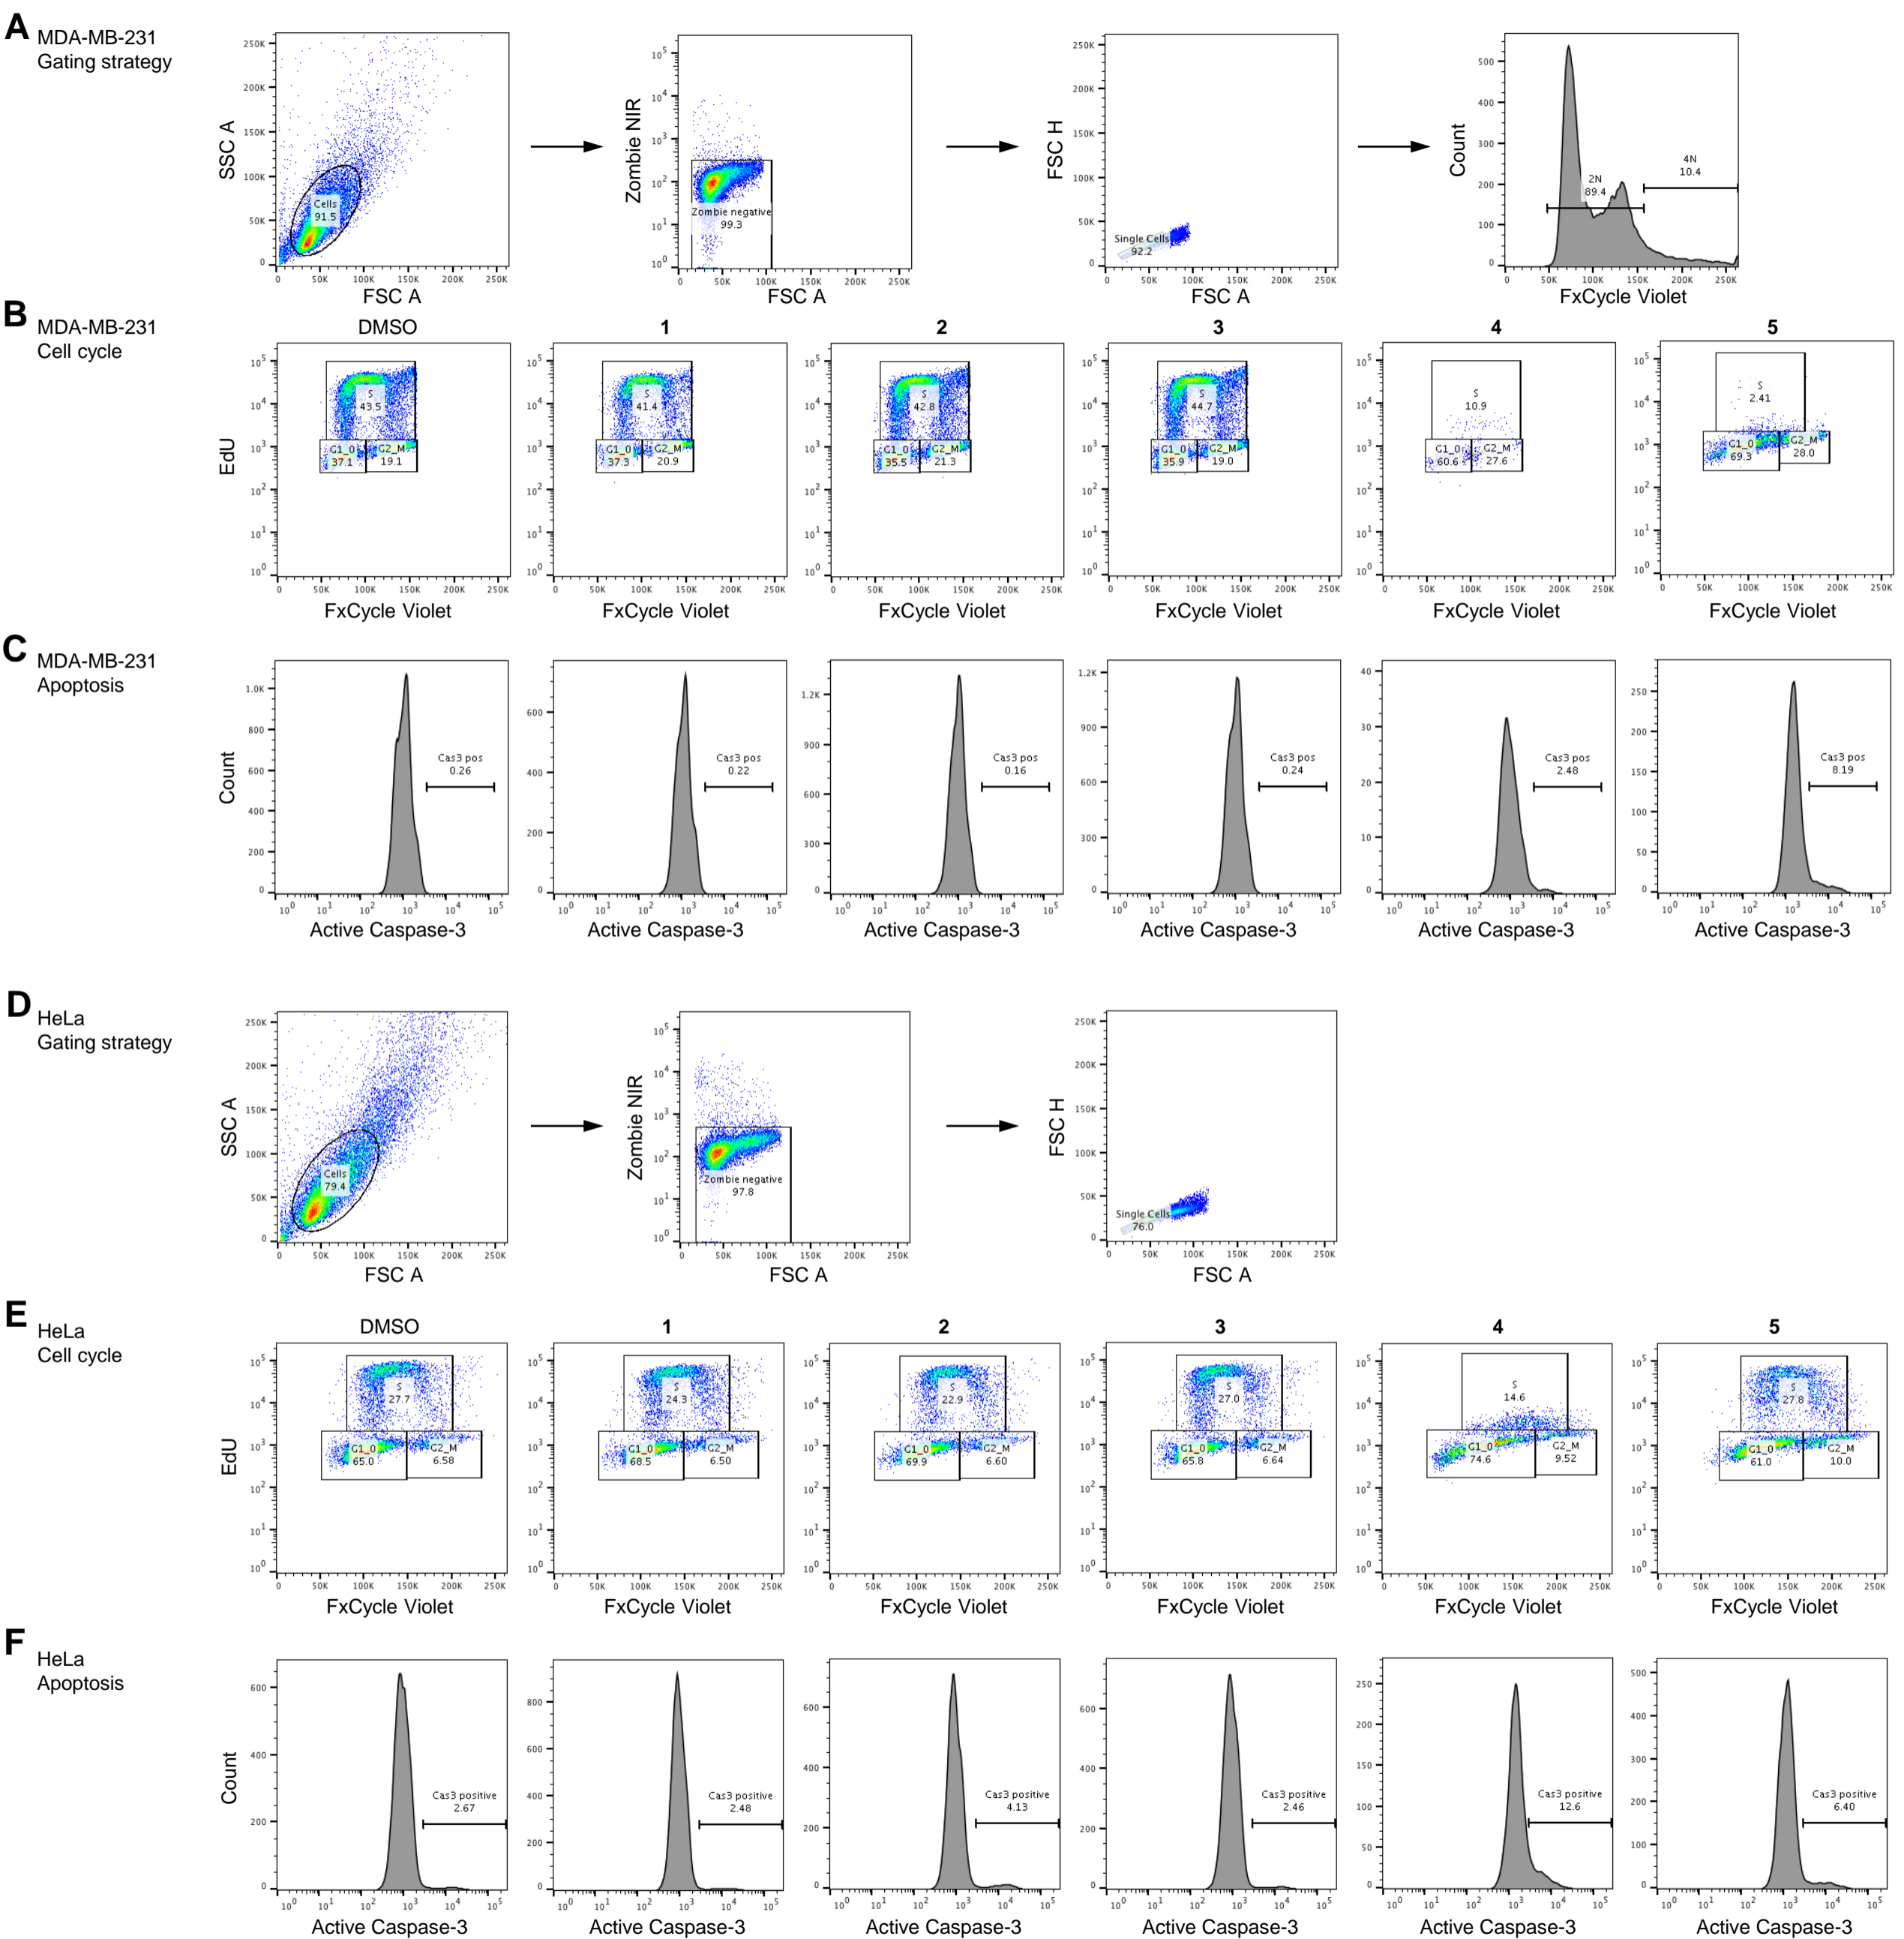

## Supplemental Figure 5. Effects on cell cycle and apoptosis in intact living cells.

Related to Figure 4.

- (A) Gating strategy for MDA-MB-231 cells. Left to right: gating of cell size, gating of living cells (Zombie NIR negative), gating of single cells and gating of the cell population with 2n only.
- (B) FACS plots showing DNA content (FxCycle Violet) staining compared to proliferation (EdU incorporation) in MDA-MB-231. Left to right: effects to cells exposed to DMSO, or **1-5** for 18 h.
- (C) FACS plots showing active Caspase-3 protein staining detected by FACS. Left to right: effects to cells exposed to DMSO, or **1-5** for 18 h.
- (D) Gating strategy for HeLa cells. Left to right: gating of cell size, gating of living cells (Zombie NIR negative), gating of single cells and gating of the cell population with 2n only.
- (E) FACS plot showing DNA content (FxCycle Violet) staining compared to proliferation (EdU incorporation) in HeLa. Left to right: effects to cells exposed to DMSO, or **1-5** for 18 h.
- (F) FACS plot showing active Caspase-3 protein staining detected by FACS. Left to right: effects to cells exposed to DMSO, or **1-5** for 18 h.
